# Supplementary material for: Synthesis of FeCo alloy magnetically aligned linear chains by the polyol process: structural and magnetic characterization
Source: Royal Society of Chemistry journal article supplement (doi:10.1039/c5tc02058a), 2015-01-01
Supplement: c5tc02058a1.pdf [file c5tc02058a1.pdf]

## Supporting Information for

# Synthesis of FeCo Alloy Magnetically-Aligned Linear Chains by Polyol Process: Structural and Magnetic Characterization

Dustin M. Clifford\*, Carlos E. Castano, Amos J. Lu, and Everett E. Carpenter\*

Department of Chemistry, Virginia Commonwealth University, Richmond, VA 23284

Authors to whom correspondence should be addressed: [clifforddm@mymail.vcu.edu](mailto:clifforddm@mymail.vcu.edu),  
[ecarpenter2@vcu.edu](mailto:ecarpenter2@vcu.edu)

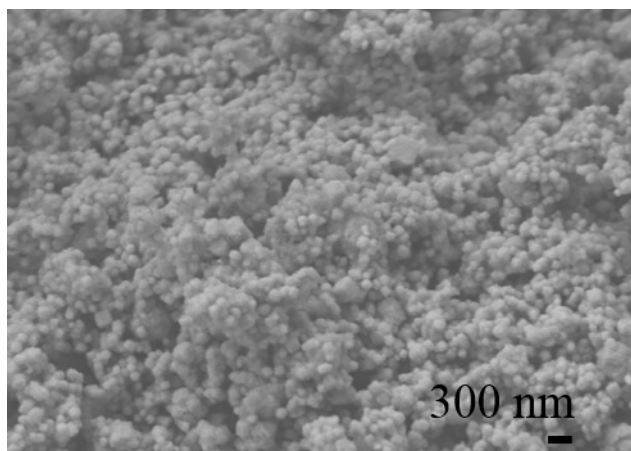

**Figure S1.** FeCo alloy cubes produced under similar reaction conditions using mechanical stirrer (no external field). Note the presence of cobalt ferrite impurities.

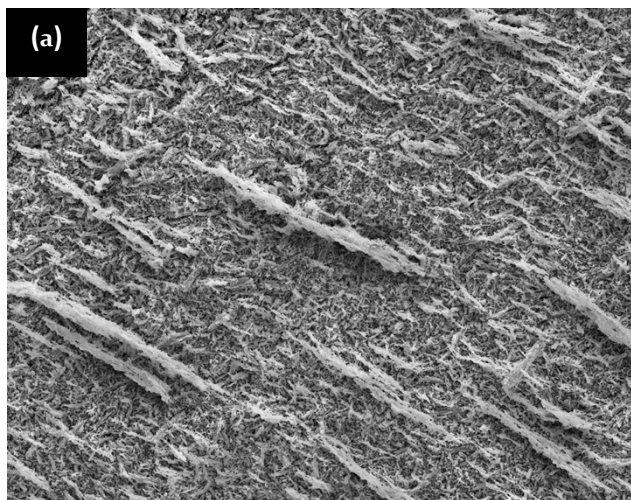

**(b)**

| Element | Wt%   | At%   |
|---------|-------|-------|
| CK      | 6.25  | 22.49 |
| OK      | 3.39  | 9.17  |
| FeK     | 51.30 | 39.70 |
| CoK     | 39.06 | 28.64 |

**Figure S2.** FeCo MALCs taken at low mag (a) used for EDS analysis with results (b) indicating an Fe-rich alloy of  $\text{Fe}_{58}\text{Co}_{42}$ .

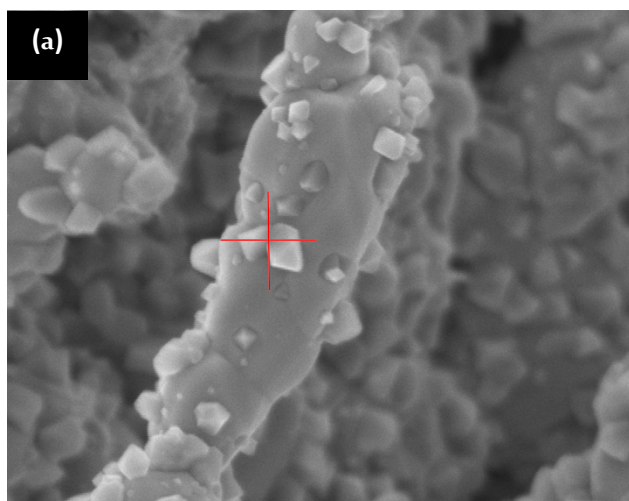

(b)

| Element | Wt%   | At%   |
|---------|-------|-------|
| OK      | 16.50 | 41.10 |
| FeL     | 65.34 | 46.62 |
| CoL     | 18.16 | 12.28 |

**Figure S3.** EDS (energy dispersive spectroscopy) point analysis (a) (red cross-hair) on secondary phase formation of 1000 K annealed FeCo MALCs. Note the formation of a continuous microwires after annealing. Quantitative EDS results (b) indicate secondary phase to be cobalt ferrite with approximate atomic ratio calculated to be  $\text{CoFe}_4\text{O}_{3.5}$ .

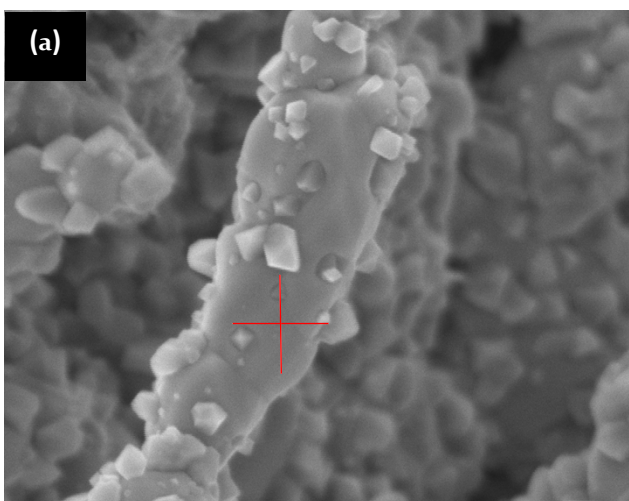

(b)

| Element | Wt%   | At%   |
|---------|-------|-------|
| OK      | 2.81  | 9.40  |
| FeL     | 48.02 | 45.99 |
| CoL     | 49.16 | 44.61 |

**Figure S4.** EDS (energy dispersive spectroscopy) point analysis (a) on FeCo alloy microwire region (non-secondary phase) of annealed (FeCo MALCs indicated by red-crosshair). Quantitative EDS results (b) indicate a Co-rich alloy of approximately  $\text{Fe}_{47}\text{Co}_{53}$  by atomic ratio.

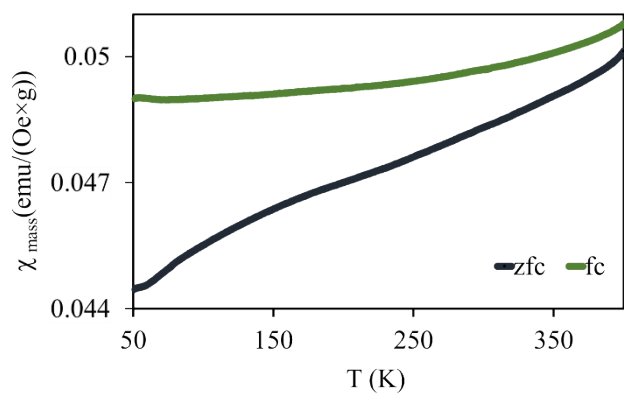

**Figure S5.** Zero-field (bottom) and field cooled (top) curves of mass susceptibility from 50 to 400 K measured under an external field of 500 Oe. Ferromagnetism is indicated by top (fc) as it possesses higher magnetization beginning at 50K than (lower) zfc plot. The blocking temperature,  $T_B$ , is over 400K.
